# Supplementary material
Source: publisher figshare collection journal article supplement (https://tandf.figshare.com/articles/dataset/_/4929800)
Supplement: Supplementary file 1 [file 1]

## Appendix D.

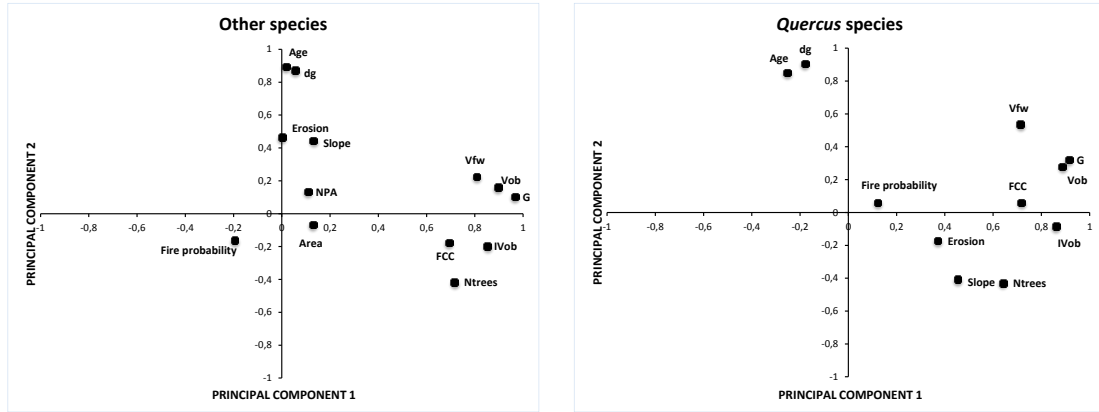

**Figure D.1.** 2D biplots of the principal component analysis (PC1 and PC2) of the variables influencing differences in carbon stock variations for *Quercus* species and Other species. *Area* represents the area of the polygon measured in hectares, *FCC* is the forest canopy cover expressed as a percentage, *Ntrees* is the number of trees per hectare, *G* is the basal area in  $\text{m}^2 \text{ha}^{-1}$ , *Vob* is the volume over bark measured in  $\text{m}^3 \text{ha}^{-1}$ , *IVob* is the mean annual increment in volume measured in  $\text{m}^3 \text{ha}^{-1} \text{year}^{-1}$ , *fire probability* is the probability of the stand being burned and expressed as a percentage, *Erosion* is the annual amount of soil lost by erosion (t of dry weight of mineral soil  $\text{ha}^{-1} \text{year}^{-1}$ ), *Slope* is the percentage slope of the polygon, *NPA* is the percentage of natural protected area expressed as a percentage.
