# Supplementary material
Source: publisher figshare collection journal article supplement (https://tandf.figshare.com/articles/dataset/_/4929800)
Supplement: Supplementary file 2 [file 1]

# 1 SUPPLEMENTARY FILES

## 2 Appendix A

3 **Table A.1.** Spearman correlation coefficients for the variables included in the present study.

| <i>Conifer species</i>                                           | <i>Area</i><br>(ha) | <i>FCC</i><br>(%) | <i>Ntrees</i><br>(trees/ha) | <i>G</i> (m <sup>2</sup> ha <sup>-1</sup> ) | <i>Vob</i> (m <sup>3</sup> ha <sup>-1</sup> ) | <i>Mai</i> (m <sup>3</sup> ha <sup>-1</sup> year <sup>-1</sup> ) | <i>V<sub>firewood</sub></i> (m <sup>3</sup> ha <sup>-1</sup> ) | <i>Age</i> (years) | <i>n<sup>o</sup> especie</i> | <i>Fire probability</i> (%) | <i>Erosion</i> | <i>Slope</i> (%) | <i>ENP</i> (%) |
|------------------------------------------------------------------|---------------------|-------------------|-----------------------------|---------------------------------------------|-----------------------------------------------|------------------------------------------------------------------|----------------------------------------------------------------|--------------------|------------------------------|-----------------------------|----------------|------------------|----------------|
| <i>Area</i> (ha)                                                 | 1.000               | 0.231*            | 0.105**                     | 0.181*                                      | 0.198*                                        | 0.139**                                                          | 0.199**                                                        | 0.063**            | 0.023                        | -0.005                      | -0.045*        | -0.053**         | -0.03**        |
| <i>FCC</i> (%)                                                   | 0.231**             | 1.000             | 0.549**                     | 0.656*                                      | 0.632*                                        | 0.649**                                                          | 0.612**                                                        | -0.006             | 0.188**                      | -0.085**                    | -0.171**       | -0.010           | 0.041*         |
| <i>Ntrees</i> (trees/ha)                                         | 0.105**             | 0.549*            | 1.000                       | 0.716*                                      | 0.569*                                        | 0.752**                                                          | 0.579**                                                        | -0.451**           | 0.223**                      | -0.189**                    | -0.022         | 0.091**          | 0.070**        |
| <i>G</i> (m <sup>2</sup> ha <sup>-1</sup> )                      | 0.181**             | 0.656*            | 0.716**                     | 1.000                                       | 0.961*                                        | 0.932**                                                          | 0.946**                                                        | 0.131**            | 0.264**                      | -0.123**                    | 0.061**        | 0.146**          | 0.050**        |
| <i>Vob</i> (m <sup>3</sup> ha <sup>-1</sup> )                    | 0.198**             | 0.632*            | 0.569**                     | 0.961*                                      | 1.000                                         | 0.884**                                                          | 0.940**                                                        | 0.264**            | 0.257**                      | -0.103**                    | 0.075**        | 0.134**          | 0.039*         |
| <i>Mai</i> (m <sup>3</sup> ha <sup>-1</sup> year <sup>-1</sup> ) | 0.139**             | 0.649*            | 0.752**                     | 0.932*                                      | 0.884*                                        | 1.000                                                            | 0.823**                                                        | -0.045**           | 0.224**                      | -0.073**                    | -0.011         | 0.068**          | 0.091**        |
| <i>V<sub>fw</sub></i> (m <sup>3</sup> ha <sup>-1</sup> )         | 0.199**             | 0.612*            | 0.579**                     | 0.946*                                      | 0.940*                                        | 0.823**                                                          | 1.000                                                          | 0.265**            | 0.321**                      | -0.117**                    | 0.052**        | 0.112**          | -0.004         |
| <i>Age</i> (years)                                               | 0.063**             | -0.006            | -0.451**                    | 0.131*                                      | 0.264*                                        | -0.045**                                                         | 0.265**                                                        | 1.000              | -0.055**                     | -0.017                      | 0.182**        | 0.170**          | -0.070**       |
| <i>n<sup>o</sup> especies</i>                                    | 0.023               | 0.188*            | 0.223**                     | 0.264*                                      | 0.257*                                        | 0.224**                                                          | 0.321**                                                        | -0.055**           | 1.000                        | -0.063**                    | 0.086**        | 0.106**          | -0.003         |
| <i>Fire probability</i> (%)                                      | -0.005              | -0.085*           | -0.189**                    | -0.123*                                     | -0.103*                                       | -0.073**                                                         | -0.117**                                                       | -0.017             | -0.063**                     | 1.000                       | -0.136**       | -0.171**         | -0.038*        |
| <i>Erosion</i> (tn ha <sup>-1</sup> year <sup>-1</sup> )         | -0.045*             | -0.171*           | -0.022                      | 0.061*                                      | 0.075*                                        | -0.011                                                           | 0.052**                                                        | 0.182**            | 0.086**                      | -0.136**                    | 1.000          | 0.779**          | 0.006          |
| <i>Slope</i> (%)                                                 | -0.053**            | -0.010            | 0.091**                     | 0.146*                                      | 0.134*                                        | 0.068**                                                          | 0.112**                                                        | 0.170**            | 0.106**                      | -0.171**                    | 0.779**        | 1.000            | 0.127**        |
| <i>ENP</i> (%)                                                   | -0.103**            | -0.041*           | 0.070**                     | 0.050*                                      | 0.039*                                        | 0.091**                                                          | -0.004                                                         | -0.070**           | -0.003                       | -0.038*                     | 0.006          | 0.127**          | 1.000          |
| <i>Quercus species</i>                                           | <i>Area</i><br>(ha) | <i>FCC</i><br>(%) | <i>Ntrees</i><br>(trees/ha) | <i>G</i> (m <sup>2</sup> ha <sup>-1</sup> ) | <i>Vob</i> (m <sup>3</sup> ha <sup>-1</sup> ) | <i>Mai</i> (m <sup>3</sup> ha <sup>-1</sup> year <sup>-1</sup> ) | <i>V<sub>firewood</sub></i> (m <sup>3</sup> ha <sup>-1</sup> ) | <i>Age</i> (years) | <i>n<sup>o</sup> especie</i> | <i>Fire probability</i> (%) | <i>Erosion</i> | <i>Slope</i> (%) | <i>ENP</i> (%) |
| <i>Area</i> (ha)                                                 | 1.000               | 0.132*            | -0.031*                     | 0.145*                                      | 0.095*                                        | -0.050**                                                         | .214**                                                         | .193**             | -0.050**                     | -0.055**                    | -.238**        | -.256**          | -.110**        |
| <i>FCC</i> (%)                                                   | 0.132**             | 1.000             | 0.495**                     | 0.614*                                      | 0.603*                                        | .535**                                                           | .530**                                                         | -.118**            | .315**                       | .085**                      | .194**         | .253**           | .094**         |
| <i>trees</i> (trees/ha)                                          | -0.031*             | 0.495*            | 1.000                       | 0.562*                                      | 0.552*                                        | .807**                                                           | .300**                                                         | -.720**            | .299**                       | .063**                      | .281**         | .353**           | .202**         |
| <i>G</i> (m <sup>2</sup> ha <sup>-1</sup> )                      | 0.145**             | 0.614*            | 0.562**                     | 1.000                                       | 0.972*                                        | .752**                                                           | .918**                                                         | .092**             | .380**                       | .065**                      | .188**         | .153**           | .058**         |
| <i>Vob</i> (m <sup>3</sup> ha <sup>-1</sup> )                    | 0.095**             | 0.603*            | 0.552**                     | 0.972*                                      | 1.000                                         | .780**                                                           | .870**                                                         | .079**             | .415**                       | .039*                       | .239**         | .197**           | .115**         |
| <i>Mai</i> (m <sup>3</sup> ha <sup>-1</sup> year <sup>-1</sup> ) | -0.050**            | 0.535*            | 0.807**                     | 0.752*                                      | .780**                                        | 1.000                                                            | .524**                                                         | -.378**            | .434**                       | .046**                      | .369**         | .365**           | .241**         |
| <i>V<sub>fw</sub></i> (m <sup>3</sup> ha <sup>-1</sup> )         | 0.214**             | 0.530*            | 0.300**                     | 0.918*                                      | .870**                                        | .524**                                                           | 1.000                                                          | .346**             | .313**                       | .076**                      | .085**         | .014             | -.048**        |
| <i>Age</i> (years)                                               | 0.193**             | -0.118*           | -0.720**                    | 0.092*                                      | .079**                                        | -.378**                                                          | .346**                                                         | 1.000              | -.097**                      | -.045**                     | -.231**        | -.328**          | -.219**        |
| <i>n<sup>o</sup> especies</i>                                    | -0.050**            | -0.315*           | 0.299**                     | 0.380*                                      | .415**                                        | .434**                                                           | .313**                                                         | -.097**            | 1.000                        | .092**                      | .261**         | .228**           | .141**         |
| <i>Fire probability</i> (%)                                      | -0.055**            | -0.085*           | 0.063**                     | 0.065*                                      | .039*                                         | .046**                                                           | .076**                                                         | -.045**            | .092**                       | 1.000                       | -.073**        | .098**           | .062**         |

|                                                                  |                  |                |                          |                                             |                                               |                                                                  |                                                                |                    |                               |                             |                |                  |                |
|------------------------------------------------------------------|------------------|----------------|--------------------------|---------------------------------------------|-----------------------------------------------|------------------------------------------------------------------|----------------------------------------------------------------|--------------------|-------------------------------|-----------------------------|----------------|------------------|----------------|
| <i>Erosion</i> (tn ha <sup>-1</sup> year <sup>-1</sup> )         | -0.238**         | -0.194*        | 0.281**                  | 0.188*                                      | .239**                                        | .369**                                                           | .085**                                                         | -.231**            | .261**                        | -.073**                     | 1.000          | .790**           | .286**         |
| <i>Slope</i> (%)                                                 | 0.256**          | -0.253*        | 0.353**                  | 0.153*                                      | .197**                                        | .365**                                                           | .014                                                           | -.328**            | .228**                        | .098**                      | .790**         | 1.000            | .343**         |
| <i>ENP</i> (%)                                                   | 0.110**          | -0.094*        | 0.202**                  | 0.058*                                      | .115**                                        | .241**                                                           | -.048**                                                        | -.219**            | .141**                        | .062**                      | .286**         | .343**           | 1.000          |
| <b>Other broadleaves</b>                                         | <i>Area</i> (ha) | <i>FCC</i> (%) | <i>Ntrees</i> (trees/ha) | <i>G</i> (m <sup>2</sup> ha <sup>-1</sup> ) | <i>Vob</i> (m <sup>3</sup> ha <sup>-1</sup> ) | <i>Mai</i> (m <sup>3</sup> ha <sup>-1</sup> year <sup>-1</sup> ) | <i>V<sub>firewood</sub></i> (m <sup>3</sup> ha <sup>-1</sup> ) | <i>Age</i> (years) | <i>n<sup>o</sup> especies</i> | <i>Fire probability</i> (%) | <i>Erosion</i> | <i>Slope</i> (%) | <i>ENP</i> (%) |
| <i>Area</i> (ha)                                                 | 1.000            | .015           | .004                     | -.110**                                     | -.098**                                       | .057                                                             | -.090**                                                        | -.131**            | -.188**                       | .372**                      | -.134**        | -.019            | -.009          |
| <i>FCC</i> (%)                                                   | .015             | 1.000          | .544**                   | .580**                                      | .549**                                        | .508**                                                           | .557**                                                         | -.124**            | .198**                        | -.155**                     | -.017          | -.073*           | .048           |
| <i>Ntrees</i> (trees/ha)                                         | .004             | .544**         | 1.000                    | .663**                                      | .617**                                        | .776**                                                           | .586**                                                         | -.482**            | .157**                        | -.064                       | -.079*         | -.116**          | .075*          |
| <i>G</i> (m <sup>2</sup> ha <sup>-1</sup> )                      | -.110**          | .580**         | .663**                   | 1.000                                       | .948**                                        | .694**                                                           | .958**                                                         | .105**             | .351**                        | -.337**                     | .084*          | -.040            | .004           |
| <i>Vob</i> (m <sup>3</sup> ha <sup>-1</sup> )                    | -.098**          | .549**         | .617**                   | .948**                                      | 1.000                                         | .772**                                                           | .883**                                                         | .061               | .272**                        | -.253**                     | -.044          | -.137**          | .044           |
| <i>Mai</i> (m <sup>3</sup> ha <sup>-1</sup> year <sup>-1</sup> ) | .057             | .508**         | .776**                   | .694**                                      | .772**                                        | 1.000                                                            | .609**                                                         | -.375**            | .067                          | .080*                       | -.248**        | -.244**          | .068*          |
| <i>V<sub>fw</sub></i> (m <sup>3</sup> ha <sup>-1</sup> )         | -.090**          | .557**         | .586**                   | .958**                                      | .883**                                        | .609**                                                           | 1.000                                                          | .165**             | .383**                        | -.344**                     | .127**         | .006             | -.048          |
| <i>Age</i> (years)                                               | -.131**          | -.124**        | -.482**                  | .105**                                      | .061                                          | -.375**                                                          | .165**                                                         | 1.000              | .236**                        | -.217**                     | .358**         | .330**           | -.028          |
| <i>n<sup>o</sup> especies</i>                                    | -.188**          | .198**         | .157**                   | .351**                                      | .272**                                        | .067                                                             | .383**                                                         | .236**             | 1.000                         | -.302**                     | .256**         | .214**           | .071*          |
| <i>Fire probability</i> (%)                                      | .372**           | -.155**        | -.064                    | -.337**                                     | -.253**                                       | .080*                                                            | -.344**                                                        | -.217**            | -.302**                       | 1.000                       | -.356**        | -.064            | .212**         |
| <i>Erosion</i> (tn ha <sup>-1</sup> year <sup>-1</sup> )         | -.134**          | -.017          | -.079*                   | .084*                                       | -.044                                         | -.248**                                                          | .127**                                                         | .358**             | .256**                        | -.356**                     | 1.000          | .776**           | .066           |
| <i>Slope</i> (%)                                                 | -.019            | -.073*         | -.116**                  | -.040                                       | -.137**                                       | -.244**                                                          | .006                                                           | .330**             | .214**                        | -.064                       | .776**         | 1.000            | .179**         |
| <i>ENP</i> (%)                                                   | -.009            | .048           | .075*                    | .004                                        | .044                                          | .068*                                                            | -.048                                                          | -.028              | .071*                         | .212**                      | .066           | .179**           | 1.000          |

\*\* Correlation is significant at the 0.01 level.

\* Correlation is significant at the 0.05 level.
